1 **Bayesian inference reveals a complex evolutionary history of belemnites**

2

3 **Authors:** Kevin Stevens<sup>1\*</sup>, Alexander Pohle<sup>2</sup>, René Hoffmann<sup>1</sup>, and Adrian Immenhauser<sup>1</sup>

4 <sup>1</sup>Institute for Geology, Mineralogy, and Geophysics, Ruhr University Bochum, Germany

5 <sup>2</sup>Palaeontological Institute and Museum, University of Zurich, Switzerland

6 \*corresponding author: [kevin.stevens@rub.de](mailto:kevin.stevens@rub.de)

7

8 **Keywords:** belemnites, phylogeny, Bayesian inference, Mesozoic, coleoid cephalopods

## 9 **ABSTRACT**

10 Belemnites are an extinct group of Mesozoic coleoid cephalopods, common in Jurassic and  
11 Cretaceous marine sedimentary rocks. Despite their significance, their total group phylogeny  
12 has rarely been considered in recent decades. In contrast, most researchers restricted the  
13 assignment of families to one of the two usually recognized subgroups, the Belemnitina and  
14 the Belemnopseina. As for many fossil cephalopods, researchers have been reluctant to  
15 employ modern phylogenetic methods to illuminate belemnites' evolutionary history.

16 To overcome the "dead end" of belemnite systematics, we performed the first tip-dated  
17 Bayesian analysis of belemnite phylogeny. In our analysis, the Aulacoceratida are found as the  
18 monophyletic sister group to belemnites. The Sinobelemitidae are resolved as paraphyletic  
19 and fall outside the Belemnitina and Belemnopseina, which make up the remaining  
20 belemnites. Belemnitina is restricted to Jurassic species with generally no or apical furrows.  
21 Holcobelidae are the earliest branching Belemnopseina. Cylindroteuthids *sensu lato* (including  
22 Oxyteuthidae) are nested within Belemnopseina, contrary to the common hypothesis placing  
23 them within the Belemnitina. Duvaliidae and Dicoelitidae are recovered as members of the  
24 Belemnopseina, but their precise relationship has to be evaluated based on more taxa and  
25 additional characters. We introduce the well-supported unranked clade Pseudoalveolata,  
26 which includes Dimitobelidae, Belemnitellidae, and members of the paraphyletic  
27 "Belemnopseidae".

28 The phylogeny presented here, based on reproducible and quantitative methods, contrasts  
29 with the usually applied authoritative "stratophenetic" approach to belemnite systematics,  
30 based on the overemphasis of single characters. This result is considered the basis for future  
31 studies on belemnite phylogeny, allowing for a rigorous testing of evolutionary hypotheses.

## 32 **PLAIN LANGUAGE SUMMARY**

33 Belemnites were common extinct cephalopods that were closely related to today's squid  
34 and cuttlefish. The most common fossil remains of belemnites are bullet-shaped calcitic  
35 "cones" (rostrum) that cover their internal shells. Belemnites' evolutionary history is not well  
36 known. Our study revealed an evolutionary tree of belemnites based on the statistical analysis  
37 of morphological features of the rostrum and calibrated to the known geological ages of the  
38 studied belemnite species. This approach was for the first time applied to belemnites and  
39 changed several aspects that were believed about their evolution.

## INTRODUCTION

40

41 Belemnites (Belemnitida) are an extinct group of stem-decabrachian coleoids (e.g., Fuchs et  
42 al., 2013; Hoffmann and Stevens, 2020). They are characterized by a calcitic rostrum, which is  
43 by far the most commonly preserved part of their internal shell. In this paper, the terms  
44 belemnites and Belemnitida are used only for these calcite-rostrum-bearing species. This  
45 definition excludes groups like the Belemnoteuthida and Diplobelida, sometimes referred to  
46 as belemnites. The paraphyletic assemblage of Belemnitida, Aulacoceratida, Belemnoteuthida,  
47 and Diplobelida is referred to as "belemnoids" in lieu of a proper understanding of their  
48 interrelationships at present (Hoffmann and Stevens, 2020). Diplobelida probably represent  
49 close relatives of crown-Decabrachia (Fuchs, 2019; Fuchs et al., 2013). Fuchs et al. (2013)  
50 regarded belemnites as sister to a group consisting of crown Decabrachia, the stem-  
51 decabrachian *Longibelus*, and the Diplobelida. In a cladistic analysis, Sutton et al. (2015) found  
52 the belemnite *Hibolithes* closely related to the coleoid genera *Phragmoteuthis* and  
53 *Belemnoteuthis*, nested within the Decabrachia crown group.

54 The relationship of the rostrum-bearing Aulacoceratida with other "belemnoid" groups, is  
55 at present also unclear (Keupp and Fuchs, 2014). Aulacoceratids have aragonitic rostra (also  
56 called "telum"; see Jeletzky, 1966) and differ in other morphological aspects from belemnites  
57 (e.g., Jeletzky, 1966; Mariotti et al., 2021), but their aragonitic rostrum likely represents the  
58 ancestral rostrum structure of coleoids.

59 The internal phylogenetic relationships of belemnites are even less clear than their  
60 relationship to other coleoids. Early subdivisions of belemnites relied on general external  
61 characteristics, mostly on the number and position of furrows, e.g., the classification of Werner  
62 (1913). Abel (1916) subdivided all belemnites into the families "Clavirostridae" and  
63 "Conirostridae" due to their early ontogenetic development. The definitions used nowadays  
64 for belemnite families go back to Stolley's (1919) and Naef's (1922) classifications. Jeletzky's

65 (1966) proposal of subdividing the calcite-rostrum bearing belemnites into apically furrowed  
66 Belemnitina and alveolar furrowed Belemnopseina has been largely followed by subsequent  
67 workers and has been virtually the only applied subdivision of belemnites higher than the  
68 family level since.

69 Recognition of the alveolar furrowed Triassic-Early Jurassic Sinobelemitidae as true  
70 belemnites (Zhu and Bian, 1984; Iba et al., 2012; Niko and Ehiro, 2022) has significantly altered  
71 views on belemnite phylogeny. Apart from the Sinobelemitidae, belemnites are exclusively  
72 known from the earliest Jurassic onwards. Earlier hypotheses of belemnite phylogeny focused  
73 on the well-known European fossil record of the group that suggested their origin during the  
74 Hettangian in the diminutive and relatively character-poor genera *Schwegleria* and *Nannobelus*,  
75 which both lack alveolar furrows. By the Early Jurassic, belemnites had reached a cosmopolitan  
76 distribution and relatively high diversity and abundance (e.g., Iba et al., 2014a, 2014b; Weis et  
77 al., 2015a). Although affected by second-order extinction events (e.g., Dera et al., 2016; Neige et  
78 al., 2021; De Baets et al., 2021), belemnites continued to be diverse during the Jurassic and early  
79 Early Cretaceous (e.g., Schlegelmilch, 1998; Mutterlose, 1988, 1998; Iba et al., 2011), with the  
80 two last occurring, disjunctively distributed families, the Boreal Belemnitellidae and the Austral  
81 Dimitobelidae, finally becoming extinct at the K/Pg-boundary (e.g., Doyle, 1992; Christensen,  
82 1997; Iba et al., 2011).

83 The evolutionary history of belemnites as a whole has rarely been studied since Jeletzky  
84 (1966). While several authors speculated about the interrelationships of belemnite families  
85 (e.g., Christensen, 1997; Iba et al., 2012; Weis et al., 2012), there has been no study of their  
86 phylogenetic relationships based on modern phylogenetic methods. This pattern reflects a  
87 general tendency of researchers studying fossil cephalopods in the past (Neige et al., 2007;  
88 Bardin et al., 2014; Pohle et al., 2022).

89 This paper presents the first quantitative approach towards belemnite phylogeny based on

90 Bayesian inference. The dichotomous subdivision of all belemnites into Belemnitina and  
91 Belemnopseina, as these groups are usually defined, is not supported by these results. Our  
92 findings challenge usual assumptions about the evolution of belemnites and identify parts of  
93 the belemnite phylogenetic tree that still lack resolution.

94

95

## METHODS

96 We selected 24 belemnite species, representative of the stratigraphic range, geographic  
97 distribution, and diversity of the whole group (Table 1) and scored them for 29 rostrum  
98 characters (Fig. 1; Supplementary Files 1, 2). Three aulacoceratid genera (including one  
99 putative genus) were also included. Although other fossil "belemnoid" coleoid groups are  
100 likely more closely related to the Belemnitida than aulacoceratids (e.g., Diplobelida,  
101 Belemnoteuthida), these do not have proper rostra (*sensu* Fuchs, 2012) and so do not  
102 contribute to the resolution of internal relationships of belemnites, whose phylogeny is here  
103 inferred based on rostrum characters only. For the vast majority of belemnites, the rostrum is  
104 the only known part (e.g., Hoffmann and Stevens, 2020) mimicking the situation for  
105 conodonts, where inferences of their phylogenetic relationships must also be based on  
106 conodont element data only (e.g., Donoghue, 2001; Bai et al., 2022). Morphological data comes  
107 from several published sources and our own observations (Table 1). The terminology of  
108 belemnite morphology follows Hoffmann and Stevens (2020) and Stevens et al. (2022). The  
109 character matrix was compiled with Mesquite version 3.7 (Maddison and Maddison, 2021).  
110 Coding practice follows suggestions by Brazeau (2011) for morphological character coding.

111 We used Bayesian tip-dating, which has become increasingly popular in recent years for  
112 phylogenetic inference from morphological data for diverse extinct groups of invertebrates,  
113 including cephalopods (e.g., Wright, 2017; Paterson, 2019; Pohle et al., 2022). The analyses  
114 were performed in BEAST 2.6.7 (Bouckaert et al., 2019) using the fossilized birth-death model

115 as a tree prior (Stadler, 2010; Gavryushkina et al., 2014; Heath et al., 2014) and the  
116 parametrization of net diversification rate, turnover and sampling proportion (Heath et al.,  
117 2014). Morphological character evolution was modeled with the Mkv model, including  
118 invariant site correction (Lewis, 2001). Characters were partitioned according to their  
119 number of states, except for character 13 ("Doppellinien" type); all characters were binary.  
120 The exchangeability rates were set to 1.0 for binary characters and 1.5 for the single three-  
121 state character to prevent the artificial upweighting of multistate characters (King et al.,  
122 2017), although this is naturally expected to have a minimal impact on the analyses. We  
123 furthermore accounted for heterogeneous rates across sites with two discretized gamma  
124 shape rate categories. Although usually four or more rate categories are employed in  
125 morphological datasets for this purpose (Harrison and Larsson, 2015), we used only two  
126 categories due to the small number of characters and states. Tip dates were fixed to the  
127 midpoint between the first and last occurrence date of the corresponding species. First and  
128 last occurrence dates are based on the literature and are calibrated to the ICS 2020 age model  
129 (Supplementary File 3; Gradstein et al., 2020). We used a strict morphological clock with a  
130 lognormally distributed prior (mean = 0.1, standard deviation = 1.25). We placed an  
131 exponential prior on the origin (mean = 10 my, offset = 253.1 my), limiting the youngest  
132 possible origin date to the age of the oldest taxon of the analysis. This approach avoids  
133 unrealistically old estimates while not imposing an overly informative prior. The prior on  
134 diversification rate was set to an exponential distribution (mean = 1.0), and the turnover prior  
135 to a uniform distribution between 0.0 and 1.0. For the sampling proportion, we used a uniform  
136 prior with an upper limit of 0.15, which we justify by a very rough estimate of the number of  
137 belemnite species in the Palaeobiology Database (PBDB), which resulted in c. 200 species.

138 Although this number likely underestimates the true number of belemnite species by some  
139 margin due to the incompleteness of both the fossil record and the PBDB, it represents a

140 useful estimate to provide an absolute upper limit for sampling rate, as it assigns zero  
141 probability to any values above 0.15 (corresponding to the ratio between taxa used in the  
142 analysis and approximate total number of known species). Lastly, we enforced a monophyletic  
143 constraint on the Belemnitida (without the Sinobelemnitidae). We justify this constraint by  
144 the strong prior expectation that this group is monophyletic (however, note that this does not  
145 preclude potential paraphyletic relationships with respect to other groups such as  
146 Diplobelida, Phragmoteuthida, or crown-Decabrachia). The analysis was run for two separate  
147 runs of the MCMC algorithm, each with 10 000 000 generations sampling every 10 000  
148 generations and 10% of the samples discarded as burn-in. Convergence was checked using  
149 Tracer (Rambaut et al., 2018). The tree files were combined in LogCombiner (Bouckaert et al.,  
150 2019) and the Maximum Clade Credibility tree was generated with TreeAnnotator, but using  
151 the older BEAST version 1.10.4 (Suchard et al., 2018) because, in contrast to TreeAnnotator in  
152 BEAST 2.6.7, it treats sampled ancestors as belonging to the same clade, which results in  
153 underestimated posterior probabilities (Barido-Sottani et al., 2020). The xml script to run the  
154 analysis in BEAST, the resulting combined log and tree files and the annotated summary tree  
155 are contained in Supplementary File 4.

156

157

## RESULTS

158 The parameter estimates of the tip-dated analyses are listed in Table 2. Although these  
159 parameters were not a focus of our current study, and more extensive model testing should be  
160 carried out before drawing any definite conclusions, they provide some insights. According to  
161 the estimated sampling rate (95% HPD interval between 0.015 and 0.15 with 27 included  
162 species), we would expect a total number of belemnite and aulacoceratid species that existed  
163 until the end of the Cretaceous to be somewhere between approximately 180 and 1 800.  
164 Although this is a rather large credible interval, it appears to be a reasonable estimate that



165 could be refined by adding more species or occurrence data. The omission of the diplobelids  
166 and phragmoteuthids, which probably belong to the same clade, may also have caused slightly  
167 biased estimates. Furthermore, refined models with variable rates through time may also  
168 improve these estimates. The age of the last common ancestor (origin parameter) of  
169 belemnites and the aulacoceratids included here was estimated to lie within the Permian,  
170 which roughly agrees with previous hypotheses (e.g., Jeletzky, 1966; Kröger et al., 2011).

171 The topology of the maximum clade credibility tree (Fig. 2) reveals several well-supported  
172 clades, although there are uncertainties in several areas of the tree. The placement of  
173 *Palaeobelemnopsis sinensis* within the Aulacoceratida is moderately well supported (posterior  
174 probability = PP = 0.69) as sister to the *Atractites alpinus* and *Aulacoceras sulcatum* clade.  
175 Furthermore, there is high support for including the sinobelemnitids within the Belemnitida  
176 (PP = 0.79), although Sinobelemnitidae itself is paraphyletic. Within the Belemnitida, there is  
177 weak support for a group containing mostly Jurassic taxa traditionally recognized as part of  
178 the Belemnitina (PP = 0.53), including *Schwegleria feifeli*, *Passaloteuthis bisulcata*, *Acrocoelites*  
179 *oxyconus*, *Megateuthis gigantea*, as well as *Lissajousibelus harleyi*, which was so far of  
180 uncertain placement inside Belemnitida. Sister to this clade is a larger group containing the  
181 remaining belemnites (PP= 0.67). Within this latter clade, several subclades displayed  
182 relatively high support: the sister group relationship between *Holcobelus munieri* and  
183 *Calabribelus pallinii* (PP = 0.79), a large clade containing belemnitids that share a  
184 pseudoalveolous (PP = 0.98); the same clade with *Belemnopsis apiconus* as sister group to the  
185 latter is moderately supported (PP = 0.64). The clade containing *Praeactinocamax plenus*,  
186 *Goniototeuthis quadrata*, *Belemnitella propinqua* and *B. mucronata* is only weakly supported (PP  
187 = 0.44). Other clades received low to moderate support. Among these, we recovered a  
188 monophyletic clade containing *Cylindroteuthis puzosiana*, *Aulacoteuthis ernsti*, and *Oxyteuthis*  
189 *brunsvicensis* (PP = 0.68), which formed a weakly supported monophyletic clade (PP = 0.25)

190 together with *Duvalia* and *Dicoelites* (PP = 0.57). Furthermore, we recovered a polyphyletic  
191 *Neohibolites* with *N. minimus* forming a monophyletic clade with *Dimitobelus diptychus* (PP =  
192 0.39) and *N. ewaldi* as sister to *Mesohibolites minaret* (PP = 0.2).

193

194

## DISCUSSION

195 Due to the shared regeneration pattern and growth mode of Xiphoteuthidae (in the  
196 phylogeny represented by *Atractites alpinus*) and belemnites, Keupp and Fuchs (2014)  
197 suggested aulacoceratid paraphyly. On the other hand, Jeletzky (1966) argued for  
198 aulacoceratid monophyly, going so far as to view the group as an independent offshoot of  
199 bactritid cephalopods, leaving no descendants. Doyle et al. (1994) favored the derivation of  
200 belemnites from within the Aulacoceratida potentially via the Phragmoteuthida.  
201 Aulacoceratida are here recovered as a monophyletic group and sister to belemnites, with the  
202 Permian *Palaeobelemnopsis sinensis* confirmed as a member of the Aulacoceratida. However,  
203 since we only included a limited number of aulacoceratids in our analysis, it is still possible  
204 that total group Aulacoceratida is paraphyletic, also with respect to other groups of early  
205 coleoids such as the Phragmoteuthida.

206 Since Jeletzky (1966), all belemnites were usually divided into two suborders; Belemnitina  
207 and Belemnopseina, with members of the former group considered ancestral to the latter.  
208 Under this traditional scheme, Belemnitina groups taxa with apical furrows and  
209 Belemnopseina taxa with alveolar furrows. Problematic under the  
210 Belemnitina/Belemnopseina-scheme is that the earliest belemnites of the Sinobelemnitidae  
211 are considered to be Belemnopseina with a gap of ca. 25 Ma between the youngest  
212 Sinobelemnitida and remaining Belemnopseina (Iba et al., 2012). At least one of the two  
213 sinobelemnitids in the current analysis, on the other hand, forms the sister group to the  
214 remaining belemnites (Fig. 2). This result is in better agreement with the fossil record than the

215 earlier hypothesis. It casts doubt on the homologization of dorsal alveolar furrows in  
216 belemnites, which was discussed as a potential uniting character of the Sinobelemnitidae with  
217 the Duvaliidae or Dicoelitidae (Iba et al., 2012). Still, a well-resolved position of the  
218 Sinobelemnitidae and clarification of their mono- or paraphyly will require a detailed study of  
219 this still sparsely known group and a better sampled Triassic fossil record of belemnites in  
220 general.

221 The species *Lissajousibelus harleyi* displays a ventral furrow in addition to dorsolateral  
222 apical furrows and was considered close to Belemnopseina by Weis et al. (2015b). In the  
223 present analysis, *L. harleyi* was found to be closely related to typical Belemnitina. Our Bayesian  
224 approach demonstrates how the relationship of belemnite taxa that do not easily fit the  
225 Belemnitina/Belemnopseina-scheme of Jeletzky (1966) can be resolved quantitatively by  
226 taking into account the maximally inclusive morphological and stratigraphic evidence.  
227 Belemnitina as defined herein is recovered as a monophyletic group with a likely origin in the  
228 Late Triassic but otherwise restricted to the Jurassic (Figs. 2 and 3). A close relationship  
229 between these taxa was already suggested by Stolley (1919), who grouped them into his  
230 family "Polyteuthidae". This new definition includes at least the likely paraphyletic  
231 "Passaloteuthidae" and the Megateuthidae (Acrocoelitidae); it remains to be investigated in  
232 which way other Jurassic families not considered in the present analysis (e.g., Hastitidae,  
233 Salpingoteuthidae) are related to this group.

234 The Holcobelidae, Duvaliidae, and Dicoelitidae have an uncertain phylogenetic placement  
235 (e.g., Stolley, 1911a, 1911b; Stevens, 1964; Jeletzky, 1966; Combémorrel, 1973; Weis et al.,  
236 2012). Our results place the Holcobelidae as the earliest branching Belemnopseina. This  
237 leaves it ambiguous whether their ventral furrow that does not reach the alveolus represents  
238 the ancestral state of the Belemnopseina or if this character represents a secondary  
239 development from an alveolar furrow reaching the alveolus as is seen in typical

240 "Belemnopseidae". In our tree, the placement of Duvaliidae as sister to Dicoelitidae finds  
241 moderate support, but the placement of this clade itself has only weak support (Fig. 2). The  
242 Duvaliidae share with the Dicoelitidae the presence of a dorsal alveolar furrow. However, a  
243 belemnopsein ventral alveolar furrow is also developed in the Dicoelitidae. *Duvalia grasiana*  
244 has recently been shown to display more organic-rich primary rostrum calcite than other  
245 belemnites (Stevens et al., 2022). A similar detailed description of the microstructure of other  
246 duvaliids and potentially related forms might reveal the phylogenetic position of this  
247 enigmatic group in future studies with more certainty.

248 The monophyletic clade containing the Oxyteuthidae as sister to *Cylindroteuthis puzosiana*  
249 confirms earlier thoughts on their phylogenetic relationships (e.g., Mutterlose, 1983).  
250 However, in contrast to these earlier hypotheses, we recovered the Cylindroteuthidae *sensu*  
251 *lato* clade within the Belemnopseina instead of within the Belemnitina. Still, the problem of  
252 the phylogenetic placement and evolution of Cylindroteuthidae and Oxyteuthidae needs  
253 further focused analyses, especially for Boreal belemnites of the Jurassic-Cretaceous  
254 transition, which will also have to include closely related species of the Pachyteuthidae. Our  
255 analysis suggests homology of the ventral furrow present in many Cylindroteuthidae *sensu*  
256 *lato*, not with the apical ventral furrow as is typical for the Megateuthidae/Acrocoelitidae, but  
257 with the belemnopsein ventral furrow. This hypothesis contrasts with the "stratophenetic"  
258 reasoning of the independent evolution of a ventral furrow in the genus *Aulacoteuthis*  
259 (Mutterlose and Baraboshkin, 2003; Baraboshkin and Mutterlose, 2004).

260 A name is suggested here for a newly identified and well-supported clade inside the  
261 Belemnopseina, the unranked Pseudoalveolata (see Appendix; PP=0.98; Fig. 2). The  
262 Pseudoalveolata is characterized by the synapomorphy of pseudoalveolus formation, a  
263 secondary alveolus-deepening, developing by dissolution/erosion of anterior organic-rich  
264 rostrum sections (Stevens et al., 2022). The pseudoalveolus is further characterized by a well-

265 mineralized “spike” projecting anteriorly toward the protoconch (*Nadelspitze* of Stolley,  
266 1911a). *Hibolithes* has here been recovered as the earliest branching pseudoalveolate  
267 belemnite. Pseudoalveolus types have been considered of great importance in the phylogeny  
268 of the Belemnitellidae (e.g., Košťák, 2012), but contrary to suggestions by Dauphin et al.  
269 (2007) and Košťák and Wiese (2008), there is no conclusive evidence for the anterior rostrum  
270 of pseudoalveolate belemnites being of primarily aragonitic composition, as it likely consisted  
271 of calcite with primarily high organic contents (see Stevens et al., 2017; 2022).

272 The two species of *Neohibolites* analyzed herein (*N. ewaldi* and *N. minimus*) are not  
273 recovered as sister species. This indicates the possibly polyphyletic or paraphyletic nature of  
274 *Neohibolites*, a genus which has long been seen as ancestral to the two only belemnite families  
275 left after the Cenomanian, the Belemnitellidae and Dimitobelidae, (e.g., Mutterlose, 1998).  
276 Future studies focusing on the origin of Belemnitellidae and Dimitobelidae might shed more  
277 light on the exact origins of these two last surviving belemnite groups and their origins in the  
278 paraphyletic “Belemnopseidae”. “Belemnopseidae” has long been recognized as paraphyletic  
279 with respect to the Belemnitellidae and Dimitobelidae (e.g., Jeletzky, 1966; Mutterlose, 1988).  
280 However, a new phylogenetic definition of the family containing all belemnites closer to  
281 *Belemnopsis* than to the Pseudoalveolata seems possible. This would require a more thorough  
282 sampling of the diverse “belemnopseid” taxa of the earliest Cretaceous and a thorough  
283 revision of not only the genus *Belemnopsis* but also *Hibolithes*, encompassing detailed revision  
284 of the diverse *Belemnopsis* species of the Austral Realm (e.g., Stevens, 1965; Challinor, 1990).  
285 Based on the unclear and absent types for both genera (e.g., Combémoré and Howlett, 1993;  
286 Mitchell, 2015), the assignment of species to either genus was often based on superficial  
287 morphological assessment. We here confirm that there is no pseudoalveolus formation in the  
288 type species of *Belemnopsis*, *B. apiciconus*. Pseudoalveolus formation had already been  
289 suggested as a differentiating character of the genera *Belemnopsis* and *Hibolithes* by Stolley

290 (1911a) but was unfortunately not followed on by later authors.

291 The tip-dated Bayesian analysis confirms earlier ideas that the epirostrum, a "tertiary"  
292 rostrum formation (Fuchs, 2012), which is developed only in some belemnites, represents a  
293 parallelism and does not indicate a close relationship (Bandel and Spaeth, 1988; Stevens et al.,  
294 2017). Epirostra are present in the analyzed species *Megateuthis gigantea*, *Holcobelus munieri*,  
295 *Calabribelus pallinii*, and *N. minimus*, found on disparate parts of our tree (Fig. 2).

296 In our proposed systematic framework (Fig. 3), we regard the potentially paraphyletic  
297 Sinobelemnitidae as the earliest branching belemnites. The remainder of the belemnites still  
298 falls into two large monophyletic clades, the Belemnitina and Belemnopseina, to preserve the  
299 current taxonomy as far as possible. We consider the *Cylindroteuthidae sensu lato*, *Duvaliidae*,  
300 and *Dicoelitidae* more derived than the *Holcobelidae* inside the Belemnopseina but otherwise  
301 of uncertain position with regard to the *Belemnopsis* + *Pseudoalveolata* clade.

302 The presented topology represents only a first step towards a well-resolved phylogeny of  
303 all belemnites. To achieve further resolution, it will likely be necessary to detect and evaluate  
304 further microstructural and geochemical data of several belemnite taxa and incorporate more  
305 taxa and characters into the analysis. Furthermore, well-preserved specimens from Konservat-  
306 Lagerstätten may provide additional valuable insights into the variability of soft-part anatomy,  
307 statoliths, radulae, hooks, or jaws within belemnites (e.g., Klug et al., 2010; Fuchs and  
308 Hoffmann, 2017), potentially adding other characters to include into phylogenetic analysis.  
309 This would also allow for a more inclusive phylogenetic analysis involving non-rostrum  
310 bearing "belemnoids" to resolve the decabrachian crown and stem groups.

311

312

## CONCLUSIONS

313 The first tip-dated analysis of belemnite (Belemnitida) phylogeny is presented. Our results

314 suggest that the usually applied dichotomous subdivision of all belemnites into Belemnitina  
315 and Belemnopseina based only on the presence of apical *versus* alveolar furrows needs some  
316 adjustment. We consequently suggest the subdivision of all belemnites, except the potentially  
317 paraphyletic and early branching Sinobelemnitidae, into newly phylogenetically defined  
318 Belemnitina and Belemnopseina. Holcobelidae are the earliest branching Belemnopseina,  
319 Duvaliidae and Dicoelitidae are confirmed as Belemnopseina but are still of uncertain  
320 placement inside this group. A major change involves the transfer of the Cylindroteuthidae  
321 (including Oxyteuthidae) from the Belemnitina to the Belemnopseina. A new well-supported  
322 subgroup of the Belemnopseina, the unranked Pseudoalveolata, is suggested here, including a  
323 phylogenetic definition and the suggestion of a potential synapomorphy.

324 Because of their high fossilization potential and often high abundance in the marine fossil  
325 record, belemnites are particularly important in tracking faunal changes of the Jurassic and  
326 Cretaceous pelagic realms. The present study is only a first step; further analyses based on  
327 more taxa and characters, including detailed microstructural analyses of the rostra, are  
328 needed to further resolve more details of the belemnites' evolutionary history. Applying  
329 quantitative and reproducible phylogenetic methodology in contrast to earlier approaches  
330 relying on authoritative overemphasis of single characters will lay a solid foundation for the  
331 future study of belemnites.

332

## CAPTIONS

**FIGURE 1.** Terminology of some of the characters applied coded for the analysis (modified after Mutterlose, 1983; Doyle, 1990; Schlegelmilch, 1998; Hoffmann and Stevens, 2020).

**FIGURE 2.** Maximum clade credibility tree of the Bayesian tip-dated analysis. Numbers at nodes represent posterior probability, while the blue bars indicate the 95% highest posterior density interval of the divergence time estimates. The small black dot represents the constrained clade. Tips with zero-length branches represent sampled ancestors.

**FIGURE 3.** Cladogram showing the here suggested systematics of the Belemnitida based on the Bayesian tip-dated analysis. Sketches show the general outer morphological features of a typical representative of the groups in either dorsal (d), ventral (v), or lateral (l) view.



FIGURES

FIGURE 1.

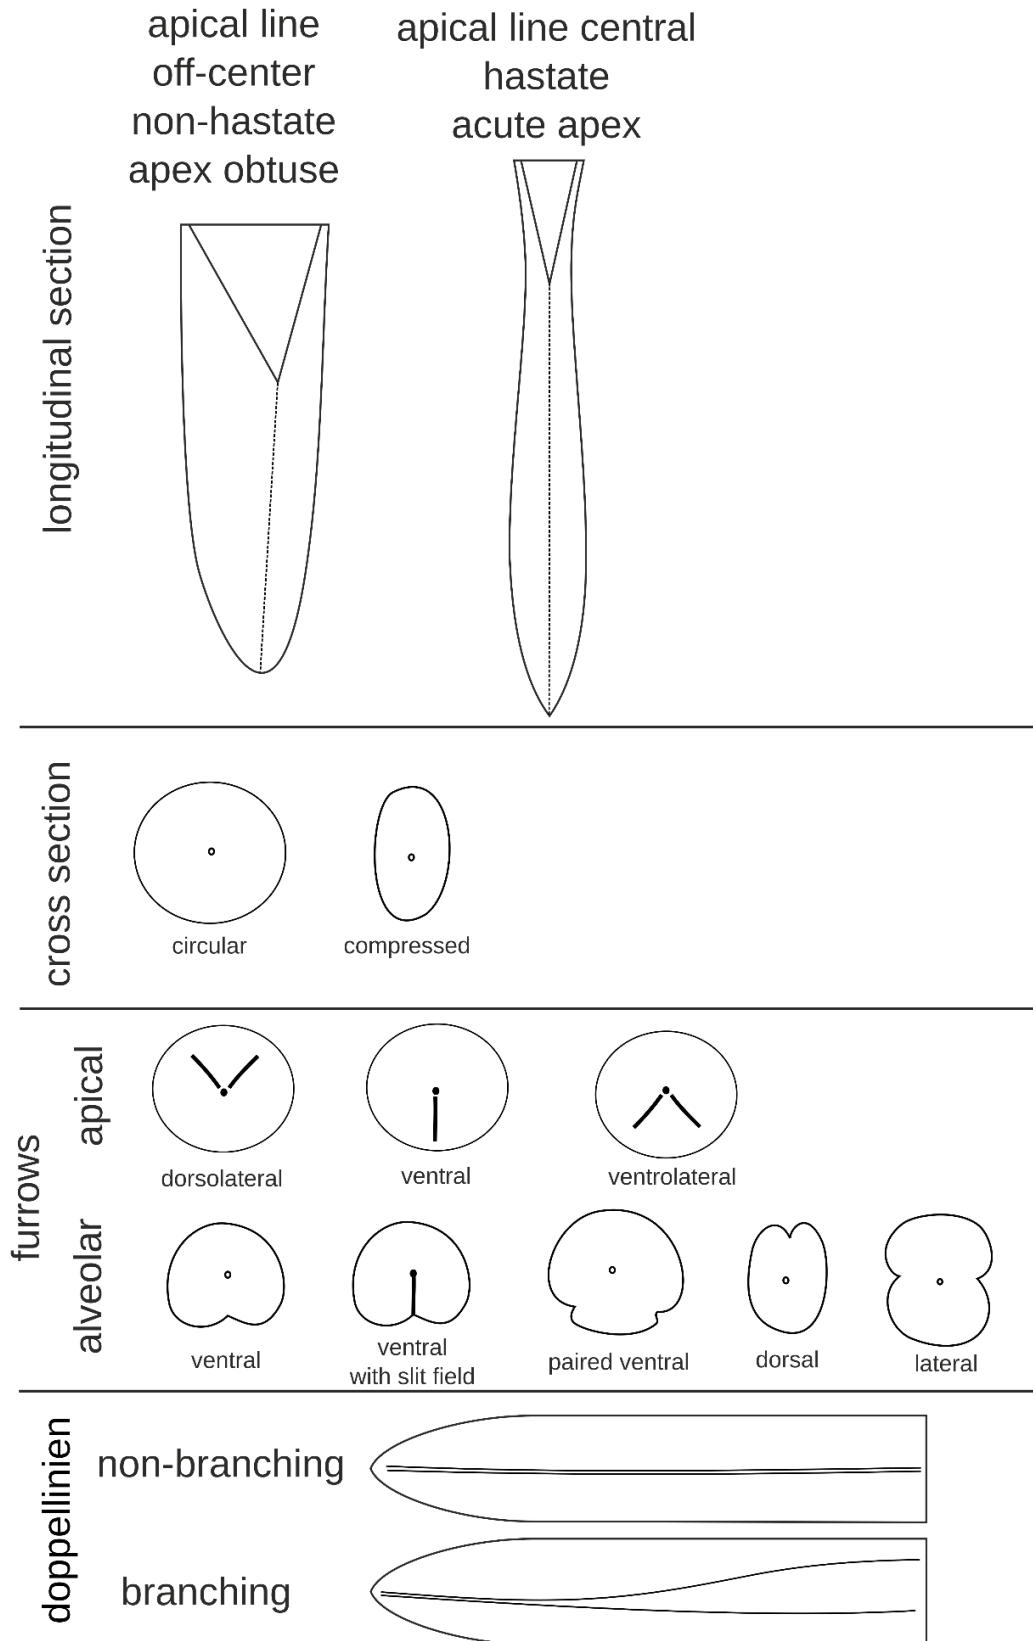

FIGURE 2.

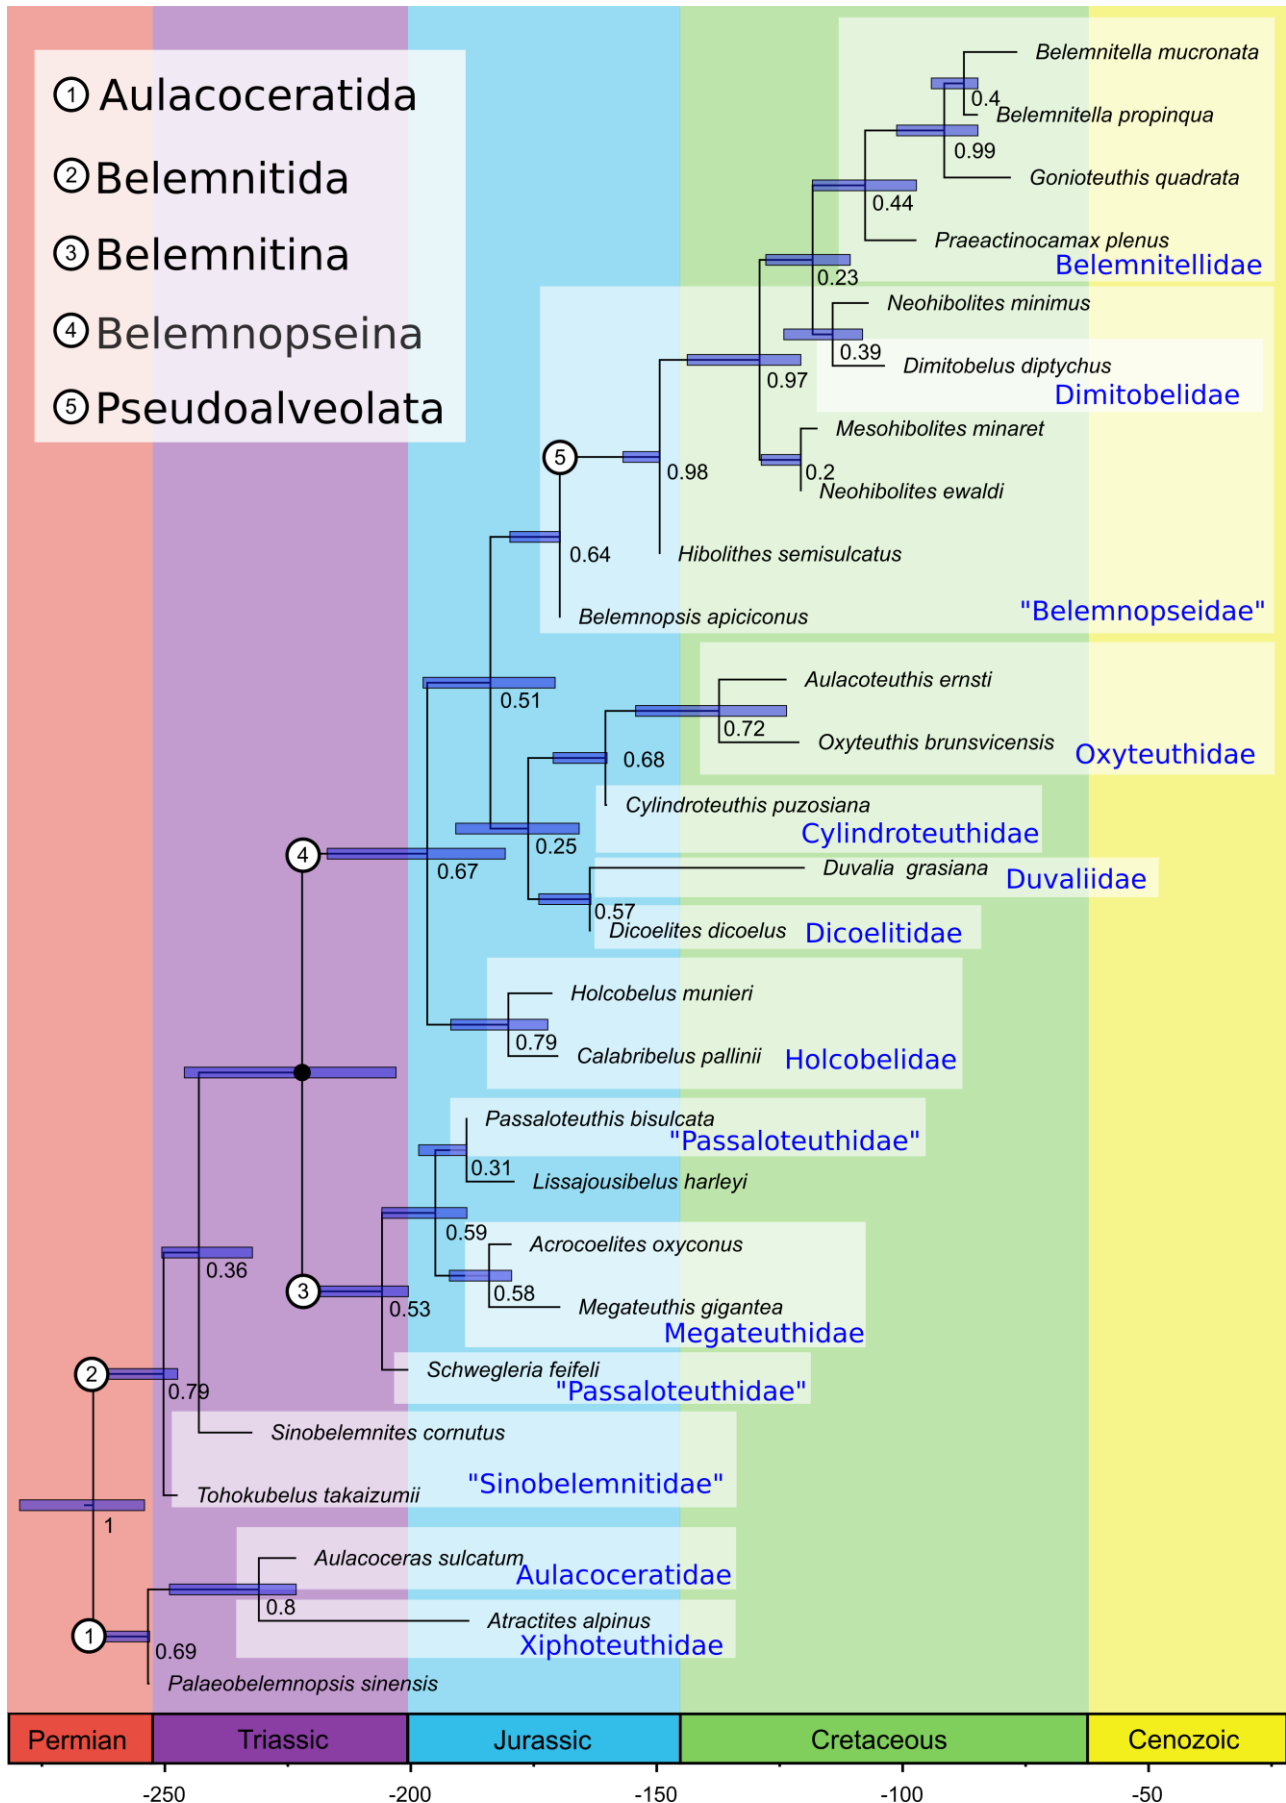

FIGURE 3.

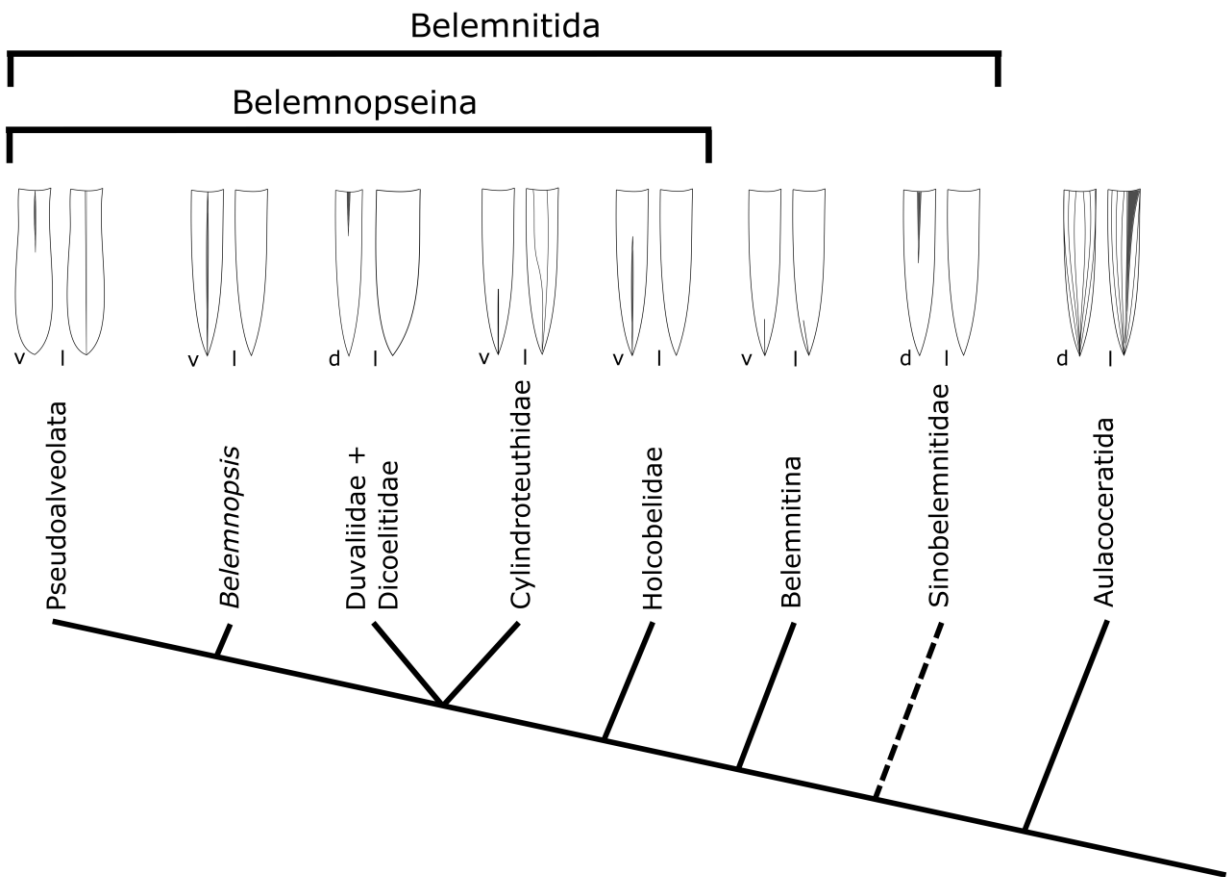

335

336

**TABLES**

337 **TABLE 1.** Overview of species used in the analysis. Assignment to suborders is here based on  
 338 previous taxonomic concepts, which may differ from the results obtained here. For more  
 339 details, see supplementary material.

| <b>Species</b>                                               | <b>(Sub-) order</b> | <b>Age</b>       | <b>Main sources</b>                                |
|--------------------------------------------------------------|---------------------|------------------|----------------------------------------------------|
| <i>Atractites alpinus</i> von Gümbel, 1861                   | Aulacoceratida      | Early Jurassic   | Jeletzky, 1966; Mariotti et al., 2021              |
| <i>Aulacoceras sulcatum</i> von Hauer, 1860                  | Aulacoceratida      | Late Triassic    | Jeletzky, 1966; Mariotti et al., 2021              |
| <i>Acrocoelites oxyconus</i> (Hehl in von Zieten, 1831)      | Belemnitina         | Early Jurassic   | Schlegelmilch, 1998                                |
| <i>Aulacoteuthis ernsti</i> Mutterlose and Baraboshkin, 2003 | Belemnitina         | Early Cretaceous | Mutterlose, 1983; Mutterlose and Baraboshkin, 2003 |
| <i>Cylindroteuthis puzosiana</i> (d'Orbigny, 1842)           | Belemnitina         | Late Jurassic    | Schlegelmilch, 1998                                |
| <i>Megateuthis gigantea</i> (von Schlotheim, 1820)           | Belemnitina         | Middle Jurassic  | Schlegelmilch, 1998, own data                      |
| <i>Oxyteuthis brunsvicensis</i> (Strombeck, 1861)            | Belemnitina         | Early Cretaceous | Stolley, 1911b; Mutterlose, 1983                   |
| <i>Passaloteuthis bisulcata</i>                              | Belemnitina         | Early Jurassic   | Schlegelmilch,                                     |

|                                   |               |                  |                   |
|-----------------------------------|---------------|------------------|-------------------|
| (Blainville, 1827)                |               |                  | 1998              |
| <i>Schwegleria feifeli</i>        | Belemnitina   | Early Jurassic   | Schlegelmilch,    |
| (Schwegler, 1939)                 |               |                  | 1998              |
| <i>Belemnitella mucronata</i>     | Belemnopseina | Late Cretaceous  | Christensen, 1997 |
| (von Schlotheim, 1813)            |               |                  |                   |
| <i>Belemnitella propinqua</i>     | Belemnopseina | Late Cretaceous  | Christensen,      |
| (Moberg, 1885)                    |               |                  |                   |
| <i>Belemnopsis apiconus</i>       | Belemnopseina | Middle Jurassic  | Schlegelmilch,    |
| (Blainville, 1827)                |               |                  | 1998              |
| <i>Calabribelus pallinii</i> Weis | Belemnopseina | Middle Jurassic  | Weis et al., 2012 |
| et al., 2012                      |               |                  |                   |
| <i>Dicoelites dicoelus</i> Boehm, | Belemnopseina | Late Jurassic    | Stevens, 1964     |
| 1906                              |               |                  |                   |
| <i>Dimitobelus diptychus</i>      | Belemnopseina | Early Cretaceous | Whitehouse, 1924; |
| (McCoy, 1867)                     |               |                  | Williamson, 2006  |
| <i>Duvalia grasiana</i> (Duval-   | Belemnopseina | Early Cretaceous | Stolley, 1911a;   |
| Jouve, 1841)                      |               |                  | Stoyanova-        |
|                                   |               |                  | Vergilova, 1970;  |
|                                   |               |                  | Combémoré,        |
|                                   |               |                  | 1973; own data    |
| <i>Goniot euthis quadrata</i>     | Belemnopseina | Late Cretaceous  | Ernst, 1964;      |
| (Blainville, 1827)                |               |                  | Christensen 1997  |

|                                                       |                                  |                  |                                                    |
|-------------------------------------------------------|----------------------------------|------------------|----------------------------------------------------|
| <i>Hibolites semisulcatus</i> (zu Münster, 1830)      | Belemnopseina                    | Late Jurassic    | Schlegelmilch, 1998; own data                      |
| <i>Holcobelus munieri</i> (Eudes-Deslongchamps, 1878) | Belemnopseina                    | Middle Jurassic  | Jeletzky, 1966; Weis et al., 2012                  |
| <i>Lissajousibelus harleyi</i> (Mayer, 1866)          | Belemnopseina                    | Early Jurassic   | Weis et al., 2015b                                 |
| <i>Mesohibolites minaret</i> (Raspail, 1829)          | Belemnopseina                    | Early Cretaceous | Stoyanova-Vergilova, 1970                          |
| <i>Neohibolites ewaldi</i> (Strombeck, 1861)          | Belemnopseina                    | Early Cretaceous | Stolley, 1911a; own data                           |
| <i>Neohibolites minimus</i> (Miller, 1826)            | Belemnopseina                    | Early Cretaceous | Stolley, 1911a; Spaeth, 1971; Stevens et al., 2017 |
| <i>Palaeobelelemnopsis sinensis</i> Chen, 1982        | Aulacoceratida<br>incertae sedis | Late Permian     | Mariotti et al., 2021                              |
| <i>Praeactinocamax plenus</i> (Blainville, 1827)      | Belemnopseina                    | Late Cretaceous  | Christensen, 1997                                  |
| <i>Sinobelemnites cornutus</i> Zhu and Bian 1984      | Belemnopseina                    | Late Triassic    | Zhu and Bian 1984                                  |
| <i>Tohokubelus takaizumii</i> Niko and Ehiro, 2022    | Belemnopseina                    | Early Triassic   | Niko and Ehiro 2022                                |

340 **TABLE 2.** Results of the parameter estimates. Abbreviations: stdev = standard deviation, HPD  
341 int = highest posterior density interval, SA = sampled ancestors.

| <b>Parameter</b> | <b>mean</b> | <b>median</b> | <b>stdev</b> | <b>95% HPD int</b> |
|------------------|-------------|---------------|--------------|--------------------|
| Clock rate       | 0.0052      | 0.0051        | 0.0013       | 0.0030 – 0.0075    |
| Diversification  | 0.012       | 0.011         | 0.0069       | 0.00084 – 0.025    |
| Turnover         | 0.918       | 0.926         | 0.049        | 0.821 – 0.992      |
| Sampling         | 0.075       | 0.073         | 0.039        | 0.015 – 0.147      |
| Origin           | 270.6       | 269.3         | 8.63         | 256.5 – 288.1      |
| SA count         | 4.71        | 5             | 1.98         | 1 – 8              |

342

343

344

## APPENDIX

345 *Phylogenetic Definition of Pseudoalveolata*

346 **Pseudoalveolata** unranked K. Stevens, A. Pohle, and R. Hoffmann, new clade name.

347 Phylogenetic definition: the least inclusive clade containing the Belemnitellidae Pavlow, 1914,

348 Dimitobelidae Whitehouse, 1924, and the species *Hibolithes semisulcatus* (zu Münster, 1830),

349 *Neohibolites ewaldi* (Strombeck, 1861), *N. minimus* (Miller, 1826), and *Mesohibolites minaret*

350 (Raspail, 1829). Etymology: derived from the belemnite morphological term pseudoalveolus,

351 itself derived from Greek pseúdo, meaning “to lie” or “to deceive”, and alveolus, from Latin,

352 meaning a small cavity. Reference phylogeny: Fig. 2. Diagnosis: In belemnite morphological

353 terminology, the alveolus is the approximately cone-shaped cavity of the rostrum, which

354 contains the phragmocone. If the alveolus is secondarily enlarged by abrasion or dissolution of

355 the anterior part of the rostrum due to an anterior primarily porous and organic-rich

356 composition of the rostrum (e.g., Stolley, 1911a; Ernst, 1964; Stevens et al., 2022), the

357 resulting secondary deepening is termed a pseudoalveolus. Anterior primarily porous and

358 organic-rich rostra, which might result in a pseudoalveolus, accordingly represent the

359 synapomorphy of the Pseudoalveolata.



360

361

## REFERENCES

362 Abel, O. 1916. Paläobiologie der Cephalopoden aus der Gruppe der Dibranchiaten. Gustav

363 Fischer Verlag, Jena, 281 pp.

364 Bai, R., Song, H., Benton, M.J., and Tian, L. 2022. Phylogenetic classification and evolution of

365 Early Triassic conodonts. *Palaeogeography, Palaeoclimatology, Palaeoecology* 585:110731.

366 <https://doi.org/10.1016/j.palaeo.2021.110731>

367 Bandel, K. and Spaeth, C. 1988. Structural differences in the ontogeny of some belemnite

368 rostra. In: Wiedmann, J., Kullmann, J. (eds.), *Cephalopods Present and Past*.

369 Schweitzerbartsche Verlagsbuchhandlung, Stuttgart, pp. 247–271.

370 Baraboshkin, E.J. and Mutterlose, J. 2004. Correlation of the Barremian belemnite successions

371 of northwest Europe and the Ulyanovsk – Saratov area (Russian Platform). *Acta Geologica*

372 *Polonica* 54:499-510.

373 Bardin, J., Rouget, I., and Cecca, F. 2014. Cladistics in ammonoids: back to the future. *Neues*

374 *Jahrbuch für Geologie und Paläontologie* 274:239-253.

375 Barido-Sottani, J., van Tiel, N.M.A., Hopkins, M.J., Wright, D.F., Stadler, T., and Warnock, R.C.M.

376 2020. Ignoring fossil age uncertainty leads to inaccurate topology and divergence time

377 estimates in time calibrated tree inference. *Frontiers in Ecology and Evolution* 8:183.

378 <https://doi.org/10.3389/fevo.2020.00183>

379 Blainville, M.H. 1827. *Mémoire sur les Bélemnites, considérés zoologiquement et*

380 *géologiquement*. Levrault, Strasbourg, 136 pp.

381 Boehm, G. 1906. *Geologische Mitteilungen aus dem Indo-australischen Archipel. 1: Neues aus*

382 *dem Indo-australischen Archipel. Neues Jahrbuch für Mineralogie, Geologie und*

383 *Paläontologie* 22:385-412.

- 384 Bouckaert, R., Vaughan, T.G., Barido-Sottani, J., Duchêne, S., Fourment, M., Gavryushkina, A.,  
385 Heled, J., Jones, G., Kühnert, D., De Maio, N., Matschiner, M., Mendes, F.K., Müller, N.F.,  
386 Ogilvie, H.A., du Plessis, L., Poppinga, A., Rambaut, A., Rasmussen, D., Siveroni, I., Suchard,  
387 M.A., Wu, C.-H., Xie, D., Zhang, C., Stadler, T., and Drummond, A.J. 2019. BEAST 2.5: An  
388 advanced software platform for Bayesian evolutionary analysis. *PLoS Computational*  
389 *Biology* 15:e1006650. <https://doi.org/10.1371/journal.pcbi.1006650>
- 390 Brazeau, M.D. 2011. Problematic character coding methods in morphology and their effects.  
391 *Biological Journal of the Linnean Society* 104:489–498. [https://doi.org/10.1111/j.1095-](https://doi.org/10.1111/j.1095-8312.2011.01755.x)  
392 [8312.2011.01755.x](https://doi.org/10.1111/j.1095-8312.2011.01755.x)
- 393 Challinor, A.B. 1990. A belemnite biozonation for the Jurassic-Cretaceous of Papua New Guinea  
394 and a faunal comparison with eastern Indonesia. *BMR Journal of Australian Geology &*  
395 *Geophysics* 11:429-447.
- 396 Chen, T. 1982. Mesozoic Coleoidea fauna from Xizang. *Palaeontology of Xizang* 4:282-325. [in  
397 Chinese]
- 398 Christensen, W.K. 1971. *Belemnitella propinqua propinqua* (Moberg, 1885) from Scandinavia.  
399 *Bulletin of the Geological Society of Denmark* 20:369-389.
- 400 Christensen, W.K. 1997. The Late Cretaceous belemnite family Belemnitellidae: Taxonomy and  
401 evolutionary history. *Bulletin of the Geological Society of Denmark* 44:59–88.
- 402 Combémoré, R. 1973. Les Duvaliidae (Pavlow) du cretace inferieur francais. *Document des*  
403 *laboratoires de geology de la faculte des sciences de Lyon* 57:131-186.
- 404 Combémoré, R. and Howlett, P. 1993. Le genre *Hibolites*: *Hibolites* Mayer-Eymar, 1883, non  
405 *Hibolithes* Montfort, 1808, belemnite du Jurassique. *Geobios* 15:67-72.
- 406 Dauphin, Y., Williams, C.T., and Barskov, I.S. 2007. Aragonitic rostra of the Turonian belemnite  
407 *Goniocamax*: Arguments from diagenesis. *Acta Palaeontologica Polonica* 52:85-97.

- 408 De Baets, K., Nätscher, P.S., Rita, P., Fara, E., Neige, P., Bardin, J., Dera, G., Duarte, L.V., Hughes, Z.,  
409 Laschinger, P., García-Ramos, J.C., Piñuela, L., Übelacker, C., and Weis, R. 2021. The impact of  
410 the Pliensbachian–Toarcian crisis on belemnite assemblages and size distribution. *Swiss*  
411 *Journal of Palaeontology* 140:25. <https://doi.org/10.1186/s13358-021-00242-y>
- 412 Dera, G., Toumoulin, A., and De Baets, K. 2016. Diversity and morphological evolution of  
413 Jurassic belemnites from South Germany. *Palaeogeography, Palaeoclimatology,*  
414 *Palaeoecology* 457:80–97. <https://doi.org/10.1016/j.palaeo.2016.05.029>
- 415 Donoghue, P.C.J. 2001. Conodonts Meet Cladistics: Recovering Relationships and Assessing the  
416 Completeness of the Conodont Fossil Record. *Palaeontology* 44:65–93.  
417 <https://doi.org/10.1111/1475-4983.00170>
- 418 Doyle, P. 1990. The British Toarcian (Lower Jurassic) Belemnites. Part 1. Monograph of the  
419 Palaeontographical Society Publication 584:1–49. The Palaeontographical Society, London.
- 420 Doyle, P. 1992. A review of the biogeography of Cretaceous belemnites. *Palaeogeography,*  
421 *Palaeoclimatology, Palaeoecology* 92:207–216.
- 422 Doyle, P., Donovan, D.T., and Nixon, M. 1994. Phylogeny and systematics of the Coleoidea. The  
423 University of Kansas, Paleontological Contributions 5:1-15.
- 424 d'Orbigny, A. 1842. *Paléontologie française: description zoologique et géologique de tous les*  
425 *animaux mollusques et rayonnés fossiles de France. Terrains crétacés. Les céphalopodes 1.*  
426 A. Bertrand.
- 427 Duval-Jouve, J. 1841. Bélemnites des terrains crétacés inférieures des  
428 environs de Castellane (Basses-Alpes), considérées géologiquement et  
429 zoologiquement, avec la description de ces terrains. Académie des  
430 Sciences Naturelles de Paris, Paris, 80 pp.
- 431 Ernst, G. 1964. Ontogenie, Phylogenie und Stratigraphie der Belemnitengattung *Goniot euthis*

- 432 BAYLE aus dem nordwestdeutschen Santon/Campan. Fortschritte der Geologie in Rheinland  
433 und Westfalen 7:113-174.
- 434 Eudes-Deslongchamps, E., 1878. Le Jura normand. 2ième livraison, monographies 4. Assises  
435 supérieures des marnes infra-oolithiques. Paris (Savy), Caen (Blanc-Hardel).
- 436 Fuchs, D. 2012. The "rostrum"-problem in coleoid terminology – an attempt to clarify  
437 inconsistencies. *Geobios* 45:29–39. <https://doi.org/10.1016/j.geobios.2011.11.014>
- 438 Fuchs, D. 2019. Part M, Coleoidea, Chapter 23E: Systematic descriptions: Diplobelida. *Treatise*  
439 *Online* 118.
- 440 Fuchs, D. and Hoffmann, R. 2017. Part M, Chapter 10: Arm armature in belemnoid coleoids.  
441 *Treatise Online* 91:1-20.
- 442 Fuchs, D., Iba, Y., Ifrim, C., Nishimura, T., Kennedy, W.J., Keupp, H., Stinnesbeck, W., and Tanabe,  
443 K. 2013. *Longibelus* gen. nov., a new Cretaceous coleoid genus linking Belemnoida and  
444 early Decabrachia. *Palaeontology* 56:1081-1106. <https://doi.org/10.1111/pala.12036>
- 445 Gavryushkina, A., Welch, D., Stadler, T., and Drummond, A.J. 2014. Bayesian inference of  
446 sampled ancestor trees for epidemiology and fossil calibration. *PLoS Computational*  
447 *Biology* 10:e1003919. <https://doi.org/10.1371/journal.pcbi.1003919>
- 448 Gradstein, F.M., Ogg, J.G., Schmitz, M.D., and Ogg, G.M. 2020. *Geologic time scale 2020*. Elsevier.
- 449 Harrison, L.B. and Larsson, H.C.E. 2015. Among-character rate variation distributions in  
450 phylogenetic analysis of discrete morphological characters. *Systematic Biology* 64:307–  
451 324. <https://doi.org/10.1093/sysbio/syu098>
- 452 Heath, T.A., Huelsenbeck, J.P., and Stadler, T. 2014. The fossilized birth-death process for  
453 coherent calibration of divergence-time estimates. *Proceedings of the National Academy of*  
454 *Sciences* 111:E2957–2966. <https://doi.org/10.1073/pnas.1319091111>

- 455 Hoffmann, R. and Stevens, K. 2020. The palaeobiology of belemnites – foundation for the  
456 interpretation of rostrum geochemistry. *Biological Reviews* 95:94–123.  
457 <https://doi.org/10.1111/brv.12557>
- 458 Iba, Y., Mutterlose, J., Tanabe, K., Sano, S., Misaki, A. and Terabe, K. 2011. Belemnite extinction  
459 and the origin of modern cephalopods 35 m.y. prior to the Cretaceous–Paleogene event.  
460 *Geology* 39:483–486. <https://doi.org/10.1130/G31724.1>
- 461 Iba, Y., Sano, S., Mutterlose, J. and Kondo, Y. 2012. Belemnites originated in the Triassic — A  
462 new look at an old group. *Geology* 40:911–914. doi:10.1130/G33402.1
- 463 Iba, Y., Sano, S., and Mutterlose, J. 2014a. The Early Evolutionary History of Belemnites: New  
464 Data from Japan. *PLoS ONE* 9:e95632.
- 465 Iba, Y., Sano, S., Rao, X., Fuchs, D., Chen, T., Weis, R., and Sha, J. 2014b. Early Jurassic belemnites  
466 from the Gondwana margin of the Southern Hemisphere–Sinemurian record from South  
467 Tibet. *Gondwana Research*. doi:10.1016/j.gr.2014.06.007
- 468 Jeletzky, J.A., 1966. Comparative morphology, phylogeny, and classification of fossil Coleoidea.  
469 The University of Kansas Paleontological Contributions 7, 162 pp.
- 470 Keupp, H. and Fuchs, D. 2014. Different regeneration mechanisms in the rostra of aulacocerids  
471 (Coleoidea) and their phylogenetic implications. *Göttingen Contributions to Geosciences*  
472 77:13-20.
- 473 King, B., Qiao, T., Lee, M.S.Y., Zhu, M., and Long, J.A., 2017. Bayesian morphological clock  
474 methods resurrect placoderm monophyly and reveal rapid early evolution in jawed  
475 vertebrates. *Systematic Biology* 66:499–516.
- 476 Klug, C., Schweigert, G., Fuchs, D., and Dietl, G. 2010. First record of a belemnite preserved with  
477 beaks, arms and ink sac from the Nusplingen Lithographic Limestone (Kimmeridgian, SW  
478 Germany): Belemnite with beaks, arms and ink sac. *Lethaia* 43:445–456.

- 479 <https://doi.org/10.1111/j.1502-3931.2009.00203.x>
- 480 Kröger, B., Vinther, J., and Fuchs, D. 2011. Cephalopod origin and evolution: a congruent  
481 picture emerging from fossils, development and molecules. *BioEssays* 33:602–13.  
482 <https://doi.org/10.1002/bies.201100001>
- 483 Košťák, M. 2012. On the Turonian origin of the *Goniocamax-Belemnitella* stock (Cephalopoda,  
484 Coleoidea). *Geobios* 45:79–85. <https://doi.org/10.1016/j.geobios.2011.11.004>
- 485 Košťák, M. and Wiese, F. 2008. Lower Turonian record of belemnite *Praeactinocamax* from NW  
486 Siberia and its palaeogeographic significance. *Acta Palaeontologica Polonica* 53:669–678.
- 487 Lewis, P.O. 2001. A likelihood approach to estimating phylogeny from discrete morphological  
488 character data. *Systematic Biology* 50:913–25.  
489 <https://doi.org/10.1080/106351501753462876>
- 490 Maddison, W. P. and Maddison, D.R. 2021. Mesquite: a modular system for evolutionary  
491 analysis. Version 3.70. <http://www.mesquiteproject.org>
- 492 Mariotti, N., Pignatti, J., and Riegraf, W. 2021. Part M, Coleoidea, Chapter 23E: Systematic  
493 descriptions: Aulacoceratida. *Treatise Online* 148.
- 494 Mayer, K. 1866. Diagnoses de bélemnites nouvelles. *Journal de Conchylogie* 3:358–369.
- 495 McCoy, F. 1867. On the occurrence of *Ichthyosaurus* and *Plesiosaurus* in Australia. *Annals*  
496 *and Magazine of Natural History* 19:355-356.
- 497 Miller, J.S. 1826. Observations on Belemnites V. *Transactions of the Geological Society of*  
498 *London*, 2nd series 1:45–62.
- 499 Mitchell, S.F. 2015. A reassessment of the validity and affinities of *Belemnites sulcatus* MILLER,  
500 1826, *Belemnopsis* EDWARDS in GRAY, 1849, and *Belemnopsis* BAYLE, 1878. *Carnets de*  
501 *Geologie* 15:31-39.

- 502 Moberg, J.C. 1885. Cephalopoderne i Sveriges Kritsystem. II. Artsbeskrifning. Sveriges  
503 geologiska undersökning. Afhandlingar och uppsatser C. 73, 65 pp.
- 504 Mutterlose, J. 1983. Phylogenie und Biostratigraphie der Unterfamilie Oxyteuthinae  
505 (Belemnitida) aus dem Barreme (Unter-Kreide) NW-Europas. Palaeontographica Abteilung  
506 A 180:1-90.
- 507 Mutterlose, J. 1988. Migration and evolution patterns in Upper Jurassic and Lower Cretaceous  
508 belemnites. In: Wiedmann, J. and Kullmann, J. (eds.), Cephalopods – Present and Past:525-  
509 537.
- 510 Mutterlose, J. 1998. The Barremian–Aptian turnover of biota in northwestern Europe:  
511 evidence from belemnites. Palaeogeography, Palaeoclimatology, Palaeoecology 144:161–  
512 173.
- 513 Mutterlose, J. and Baraboshkin, E.J. 2003. Taxonomy of the Early Cretaceous belemnite species  
514 *Aulacoteuthis absolutiformis* (Sinzow, 1877) and its type status. Berliner Paläobiologische  
515 Abhandlungen 3:179-187.
- 516 Naef, A. 1922. Die fossilen Tintenfische. Verlag Gustav Fischer, Jena. 322 pp.
- 517 Neige, P., Rouget, I., and Moyne, S. 2007. Phylogenetic Practices Among Scholars of Fossil  
518 Cephalopods, with Special Reference to Cladistics, in: Landman, N.H., Davis, R.A., Mapes,  
519 R.H. (eds.), Cephalopods Present and Past: New Insights and Fresh Perspectives. Springer  
520 Netherlands, Dordrecht, pp. 3–14.
- 521 Neige, P., Weis, R., and Fara, E. 2021. Ups and downs of belemnite diversity in the Early Jurassic  
522 of Western Tethys. Palaeontology 64:263–283. <https://doi.org/10.1111/pala.12522>
- 523 Niko, S., Ehiro, M. 2022. *Tohokubelus* gen. nov., the Oldest Belemnite from the Olenekian  
524 (Lower Triassic) of Northeast Japan. Paleontological Research 26:115-123.  
525 <https://doi.org/10.2517/PR200036>

- 526 Paterson, J.R., Edgecombe, G.D., and Lee, M.S.Y. 2019. Trilobite evolutionary rates constrain the  
527 duration of the Cambrian explosion. *Proceedings of the National Academy of Sciences*  
528 116:4394–4399. <https://doi.org/10.1073/pnas.1819366116>
- 529 Pohle, A., Kröger, B., Warnock, R.C.M., King, A.H., Evans, D.H., Aubrechtová, M., Cichowolski, M.,  
530 Fang, X., and Klug, C. 2022. Early cephalopod evolution clarified through Bayesian  
531 phylogenetic inference. *BMC Biology* 20:88. [https://doi.org/10.1186/s12915-022-01284-](https://doi.org/10.1186/s12915-022-01284-5)  
532 5
- 533 Rambaut, A., Drummond, A.J., Xie, D., Baele, G., Suchard, M.A. 2018. Posterior summarization in  
534 Bayesian phylogenetics using Tracer 1.7. *Systematic Biology* 67:901–904.  
535 <https://doi.org/10.1093/sysbio/syy032>
- 536 Raspail, F.V. 1829. Histoire naturelle des belemnites, accompagnee de la description et de la  
537 classification des especes, que M. Emeric de Castellane a recueillies dans les Basses-Alpes  
538 de Provence. *Annales de science d'observation* 1:271-331.
- 539 Schlegelmilch, R., 1998. Die Belemniten des suddeutschen Jura. Ein Bestimmungsbuch für  
540 Geowissenschaftler und Fossiliensammler. Gustav Fischer Verlag, Stuttgart, 151 pp.
- 541 Schwegler, E. 1939. Belemniten aus dem Pylonotenton Schwabens. *Zentralblatt für*  
542 *Mineralogie, Geologie und Paläontologie, Abteilung B* 5:200-208.
- 543 Spaeth, C. 1871. Untersuchungen an Belemniten des Formenkreises um *Neohibolites minimus*  
544 (Miller 1826) aus dem Mittel- und Ober-Alb Nordwestdeutschlands. Beihefte zum  
545 *Geologischen Jahrbuch* 100:127 pp.
- 546 Stadler, T. 2010. Sampling-through-time in birth-death trees. *Journal of Theoretical Biology*  
547 267:396–404. <https://doi.org/10.1016/j.jtbi.2010.09.010>
- 548 Stevens, G.R. 1964. The belemnite genera *Dicoelites* Boehm and *Prodicolites* Stolley.  
549 *Palaeontology* 7:606-620.



- 550 Stevens, G.R. 1965. The Jurassic and Cretaceous of New Zealand and a Review of the Jurassic  
551 and Cretaceous belemnites of the Indo-Pacific Region. New Zealand Geological Survey  
552 Paleontological Bulletin 36:1-238.
- 553 Stevens, K., Griesshaber, E., Schmahl, W., Casella, L.A., Iba, Y., and Mutterlose, J. 2017. Belemnite  
554 biomineralization, development, and geochemistry: The complex rostrum of *Neohibolites*  
555 *minus*. Palaeogeography, Palaeoclimatology, Palaeoecology 468:388–402.  
556 <https://doi.org/10.1016/j.palaeo.2016.12.022>
- 557 Stevens, K., Mutterlose, J., Ohnemus, B., Idakieva, V., Ivanov, M. 2022. Microstructures of Early  
558 Cretaceous belemnites and their diagenesis. Cretaceous Research 105259.  
559 <https://doi.org/10.1016/j.cretres.2022.105259>
- 560 Stolley, E. 1911a. Beitrage zur Kenntnis der Cephalopoden der norddeutschen unteren Kreide,  
561 I. Die Belemniten der norddeutschen unteren Kreide, 1. Die Belemniten des  
562 norddeutschen Gaults (Aptiens und Albiens). Geologische und Palaontologische  
563 Abhandlungen 10:3.
- 564 Stolley, E. 1911b. Studien an den Belemniten der unteren Kreide Norddeutschlands.  
565 Jahresberichte des niedersächsischen geologischen Vereins 4:174-191.
- 566 Stolley, E. 1919. Die Systematik der Belemniten. Jahresbericht des niedersächsischen  
567 geologischen Vereins 11:1-59.
- 568 Stoyanova-Vergilova, M. 1970. Les Fossiles de Bulgarie, IVa Cretace inferieur, Belemnitida [in  
569 Bulgarian]. Academie Bulgare des Sciences.
- 570 Strombeck, A.V. 1861. Über den Gault und besondere die Gargas-Mergel (Aptien d'Orb.) im  
571 nordwestlichen Deutschland nächst dem Harze. Zeitschrift der deutschen geologischen  
572 Gesellschaft 13:20-60.
- 573 Suchard, M.A., Lemey, P., Baele, G., Ayres, D.L., Drummond, A.J., and Rambaut, A. 2018. Bayesian

- 574 phylogenetic and phylodynamic data integration using BEAST 1.10. *Virus Evolution*  
575 4:vey016. <https://doi.org/10.1093/ve/vey016>
- 576 Sutton, M., Perales-Raya, C., Gilbert, I. 2015. A phylogeny of fossil and living neocoleoid  
577 cephalopods. *Cladistics* 32:297-307. <https://doi.org/10.1111/cla.12131>
- 578 von Gümbel, C.W. 1861. Geognostische Beschreibung des bayerischen Alpengebirges und  
579 seines Vorlandes 1. J. Perthes. Gotha.
- 580 von Hauer, F. 1860. Nachträge zur Kenntniss der Cephalopoden-Fauna der Hallstätter  
581 Schichten. Sitzungsberichte der kaiserlichen Akademie der Wissenschaften,  
582 mathematisch-naturwissenschaftliche Classe 41:113–148.
- 583 von Schlotheim, E.F. 1813. Beiträge zur Naturgeschichte der Versteinerungen in  
584 geognostischer Hinsicht. Leonhard's Taschenbuch für die gesammte Mineralogie 7: 3-134.
- 585 von Schlotheim, E.F. 1820. Die Petrefaktenkunde auf ihrem jetzigen Standpunkte, durch die  
586 Beschreibung seiner Sammlung versteinerner und fossiler Überreste des Thier- und  
587 Pflanzenreichs der Vorwelt erläutert. Becker, Gotha, 499 pp.
- 588 von Zieten, K.H.V. (1830-1833). Die Versteinerungen Württembergs. Schweizerbart, Stuttgart,  
589 120 pp.
- 590 Weis, R., Mariotti, N., and Di Cencio, A. 2015a. Systematics and evolutionary implications of  
591 Early Jurassic belemnites from the Peri-Mediterranean Tethys. *Paläontologische Zeitschrift*  
592 89:729-747. <https://doi.org/10.1007/s12542-015-0265-5>
- 593 Weis, R., Dzyuba, O.S., Mariotti, N., and Chesnier, M. 2015b. *Lissajousibelus* nov. gen., an Early  
594 Jurassic canaliculate belemnite from Normandy, France. *Swiss Journal of Palaeontology*  
595 134:289–300. <https://doi.org/10.1007/s13358-015-0086-x>
- 596 Werner, E. 1913. Über die Belemniten des schwäbischen Lias und die mit ihnen verwandten

- 597        Formen des Braunen Jura (Acoeli). *Palaeontographica* 59:103-154.
- 598    Whitehouse, F. W. 1924. Dimitobelidae — A new family of Cretaceous belemnites. *Geological*  
599        *Magazine* 61:410-416.
- 600    Williamson, T. 2006. Systematics and biostratigraphy of Australian early cretaceous  
601        belemnites with contributions to the timescale and palaeoenvironmental assessment of  
602        the early Australian early cretaceous system derived from stable isotope proxies.  
603        Unpublished PhD thesis, James Cook University, Cairns, North Queensland, Australia.
- 604    Wright, D.F. 2017. Bayesian estimation of fossil phylogenies and the evolution of ealy to middle  
605        Palaeozoic crinoids (Echinodermata). *Journal of Paleontology* 91:799–814.  
606        <https://doi.org/10.1017/jpa.2016.141>
- 607    Zhu, K.-Y. and Bian, Z.-X. 1984. Sinobelemnitidae, a new family of Belemnitida from the Upper  
608        Triassic of Longmenshan, Sichuan. *Acta Palaeontologica Sinica* 23:300-325.
- 609    zu Münster, G. 1830. Bemerkungen zur näheren Kenntnis der Belemniten. Birner, Bayreuth, 18  
610        pp.
